# Supplementary material
Source: PubMed Central journal article supplement (PMC3074608)

Graphical Abstract

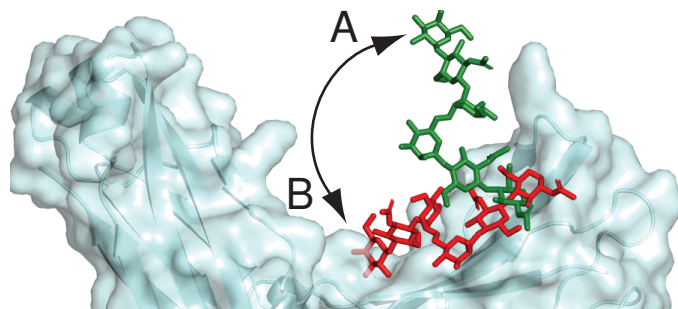

Supplement: NIHMS257929-supplement-2.pdf [file NIHMS257929-supplement-2.pdf]
